# Supplementary material
Source: publisher figshare collection journal article supplement (https://frontiersin.figshare.com/ndownloader/files/13486151)
Supplement: Supplementary file [file 13486151]

### The temporal trajectory of the progression of simulator sickness

| Authors and publication date   | Study design (between or within subject) | Number of participants | Type of virtual reality technology used                                                                                                                                   | Time of simulator/VR exposure                                             | Method of measurement                                             | Periods when simulator sickness was measured                                                                                                                        | Results (concerning the temporal aspect)                                                                                                                                                                                                          |
|--------------------------------|------------------------------------------|------------------------|---------------------------------------------------------------------------------------------------------------------------------------------------------------------------|---------------------------------------------------------------------------|-------------------------------------------------------------------|---------------------------------------------------------------------------------------------------------------------------------------------------------------------|---------------------------------------------------------------------------------------------------------------------------------------------------------------------------------------------------------------------------------------------------|
| Cobb et al., 1999              | between subject                          | 4                      | Provision system, a virtual gallery                                                                                                                                       | 1 or 2 hours                                                              | Simulator Sickness Questionnaire                                  | Non-specified                                                                                                                                                       | All participants: SSQ scores increasing up to one hour.<br>Two participants: withdrawal after one hour, severe simulator sickness symptoms.<br>Two participants: after 75 min symptoms subsided.                                                  |
| Kennedy, Stanney, Dunlap, 2000 | between subject                          | 938                    | Military flight simulators                                                                                                                                                | 4 categories: 0-1 hour, 1-2 hours, 2-3 hours, 3 or more hours             | Simulator Sickness Questionnaire                                  | Non-specified                                                                                                                                                       | SSQ scores increase gradually when exposure duration increases.                                                                                                                                                                                   |
| Min et al., 2004               | within subject                           | 20                     | Driving simulator                                                                                                                                                         | 60 minutes                                                                | Simulator Sickness Questionnaire, EEG, GSR, ECG, skin temperature | SSQ: before the experiment, 12 times during the experiment (every 5 minutes; orally), after the experiment.<br>= 14 times in total                                  | Total SSQ score and scores for all subscales increase significantly in time. Total SSQ, disorientation, nausea - significant increase from the 10th minute of trial. Oculomotor disturbance - significant increase from the 15th minute of trial. |
| Moss, Muth, 2011               | between subject                          | 80                     | HMD; locating objects in VR (head movements)                                                                                                                              | five 2-min trials                                                         | Simulator Sickness Questionnaire (orally; pre-recorded cassette)  | SSQ: before the experiment (pre-practice), after the practice sessions, after each trial (5 times), 5 min post exposure, 10 min post exposure<br>= 9 times in total | A significant effect of VR exposure duration.<br>After 5th trial - significantly higher SSQ total score than all other measurements.                                                                                                              |
| Lee, Kim, Kim, 2017            | within subject                           | 20                     | Three types of walking simulators:<br>HMD + a gamepad (Xbox 360);<br>Only HMD + sensors detecting hand movements;<br>HMD + march-in-place detectors: sensors and portable | Not given in detail; three trials in each environment = 9 trials in total | Simulator Sickness Questionnaire                                  | After each trial<br>= 9 times in total                                                                                                                              | Simulator sickness symptoms severity increases in time (between 180 s and 300 s exposure duration) - the change was the biggest for the gamepad, the smallest for the march-in-place device (but no information on statistical significance).     |

|                             |                |           |                                                                                                                         |                                                                                                      |                                                                                                                  |                                                                               |                                                                                                                                                                                                          |
|-----------------------------|----------------|-----------|-------------------------------------------------------------------------------------------------------------------------|------------------------------------------------------------------------------------------------------|------------------------------------------------------------------------------------------------------------------|-------------------------------------------------------------------------------|----------------------------------------------------------------------------------------------------------------------------------------------------------------------------------------------------------|
|                             |                |           | simulators attached to legs.<br>Three VR environments (cartoon town, realistic nature environment, low poly landscape). |                                                                                                      |                                                                                                                  |                                                                               |                                                                                                                                                                                                          |
| Lo and So, 2001             | within subject | 16        | HMD                                                                                                                     | 20 min, 4 separate days (at least 7 days break)                                                      | Nausea severity on a 0-6 scale (“no symptom” – “moderate nausea, want to stop”) Simulator Sickness Questionnaire | Nausea – verbally, each 5 min<br>SSQ – before and after exposure              | Nausea severity increases linearly during a 20-min exposure (no significant difference between the 15 <sup>th</sup> and 20 <sup>th</sup> minute).                                                        |
| So, Lo, Ho, 2001            | within subject | 96        | HMD (Virtual Research VR4)                                                                                              | 30 min                                                                                               | Nausea severity on a 0-6 scale (no symptom – moderate nausea, want to stop) Simulator Sickness Questionnaire     | Nausea – verbally, each 5 min<br>SSQ – before and after exposure              | Nausea scores increase significantly between the 5 <sup>th</sup> and 10 <sup>th</sup> minute of the exposure.                                                                                            |
| Jarchow and Young, 2007     | within subject | Not given | HMD                                                                                                                     | Two consecutive days, each time circa 12 min                                                         | Single question, 0-20 scale (“normal” – “about to vomit”)                                                        | Once per minute                                                               | Within a single session the severity of symptoms increases (only in one of the conditions).                                                                                                              |
| Classen and Owens, 2010     | within subject | 44        | Not given                                                                                                               | Circa 25 min                                                                                         | Simulator Sickness Questionnaire                                                                                 | Before the exposure, after an acclimation period, after a 20-min trial.       | The simulator sickness severity increases between the baseline score and after-acclimation and between baseline and post exposure (not between after-acclimation and post exposure).                     |
| Sinitski et al., 2018       | within subject | 30        | CAREN-Extended VR (a curved visual projection display + a treadmill)                                                    | 60 min                                                                                               | Simulator Sickness Questionnaire                                                                                 | Before the exposure, after a 15-min acclimation period, after a 45-min trial. | A small increase in the disorientation scale observed after the acclimation period; symptoms decreased by the end of the session.                                                                        |
| Moss, Scisco and Muth, 2008 | within subject | 10        | HMD                                                                                                                     | Two sessions separated by 7 days: two 48-s practice trials + five 2-min trials = circa 12 min during | Simulator Sickness Questionnaire                                                                                 | Before the practice, after practice, after each of the 5 trials               | Simulator sickness severity increases in time (more severe after the last trial than: before the practice, after the practice, after the 1st, 2nd and 3rd trials). No significant differences discovered |

|                                                              |                |    |                                                                              |                                                                                                                     |                                                                                         |                                                                                                                                                     |                                                                                                                                     |
|--------------------------------------------------------------|----------------|----|------------------------------------------------------------------------------|---------------------------------------------------------------------------------------------------------------------|-----------------------------------------------------------------------------------------|-----------------------------------------------------------------------------------------------------------------------------------------------------|-------------------------------------------------------------------------------------------------------------------------------------|
|                                                              |                |    |                                                                              | single session                                                                                                      |                                                                                         |                                                                                                                                                     | between the 4th and 5th trial.                                                                                                      |
| Moss et al., 2011                                            | within subject | 22 | HMD                                                                          | Two sessions separated by 7 days: two 48-s practice trials + five 2-min trials = circa 12 min during single session | Simulator Sickness Questionnaire                                                        | Before the practice, after practice trials, after each trial, 5 and 10 min post exposure                                                            | Simulator sickness severity increases with increase of exposure duration.                                                           |
| Serge and Moss, 2015                                         | within subject | 12 | HMD – Oculus Rift                                                            | 16 minutes                                                                                                          | Revised Simulator Sickness Questionnaire                                                | Before VR exposure, after 8 and 16 minutes of exposure                                                                                              | Simulator sickness severity increases in time.                                                                                      |
| Singer, Ehrlich and Allen, 1998                              | within subject | 32 | Virtual Research Corporation VR4 HMD                                         | Not given                                                                                                           | Simulator Sickness Questionnaire                                                        | Before VR exposure, “Mid-Experiment”, “Post-Experiment”, after 30 min rest                                                                          | Simulator sickness severity increases in time, difference not significant or the “Mid-Experiment” and “Post-Experiment” comparison. |
| Feenstra, Bos and van Gent, 2011                             | within subject | 11 | Motion simulator – a moving cabin with screens                               | 3 days in a row, each day 20 min                                                                                    | Misery Scale (MISC)                                                                     | Before the immersion, and at five time points: 2 <sup>nd</sup> , 5 <sup>th</sup> , 10 <sup>th</sup> , 15 <sup>th</sup> and 20 <sup>th</sup> minute. | Simulator sickness severity increases in time, but after spending 10 minutes in the VR.                                             |
| Chung et al., 2007<br>Park et al., 2008<br>Choi et al., 2009 | within subject | 20 | Driving graphic simulator                                                    | 10 min practice + 60 min trial                                                                                      | Simulator Sickness Questionnaire                                                        | Every 5 min                                                                                                                                         | Simulator sickness severity increases in time.                                                                                      |
| Aldaba et al., 2017                                          | within subject | 20 | HMD: HTC Vive or Oculus Rift CV1                                             | 4 sessions with at least 1 day break single trial time not specified                                                | Simulator Sickness Questionnaire                                                        | Before the VR immersion and after the 1 <sup>st</sup> , 4 <sup>th</sup> and 8 <sup>th</sup> trial                                                   | Simulator sickness severity increases in time.                                                                                      |
| Reinhard et al., 2017                                        | within subject | 28 | Fixed-base driving simulator with a projection screen and a cockpit of a car | Two days, 7-14 days of break<br>First day: 6 20-min immersions.<br>Second days: 4 20-min immersions                 | Fast Motion Sickness Scale                                                              | Every minute                                                                                                                                        | Simulator sickness severity increases in time.                                                                                      |
| McCauley et al., 1990                                        | within subject | 48 | Flight simulator – motion system, a cockpit, screen                          | 10 min training + 4 10-min trials                                                                                   | A 7-point scale (“normal, symptom-free” – “severe discomfort, I am unable to continue”) | Three times during each trial: before, in the middle, after                                                                                         | The severity of symptoms increases between the measurements.                                                                        |
